# Supplementary figures and images for: Assessment of future changes in water availability and aridity
Source: PubMed Central journal article supplement — Geophys Res Lett. 2015 Jul 4;42(13):5493–9. doi: 10.1002/2015GL064127 (PMC4810427; doi:10.1002/2015gl064127), 2015-07-04

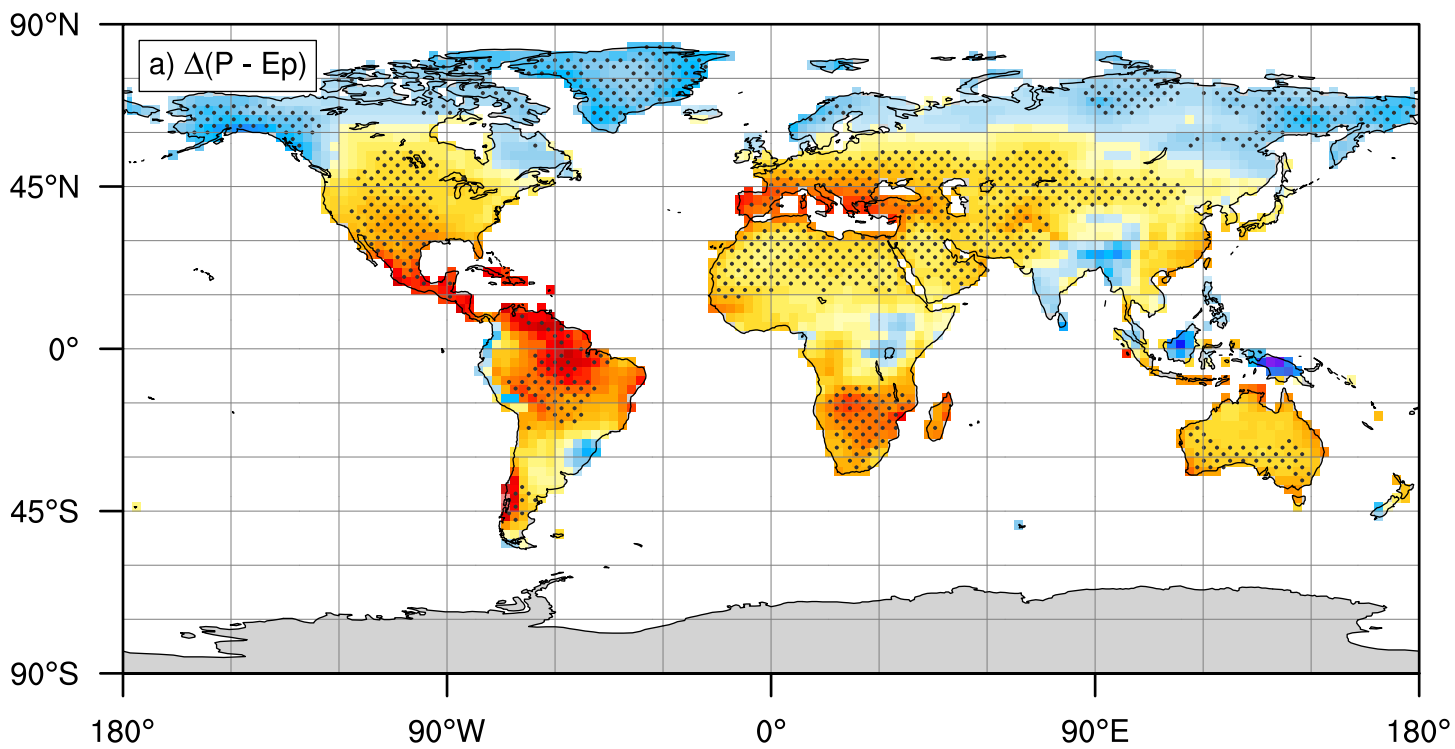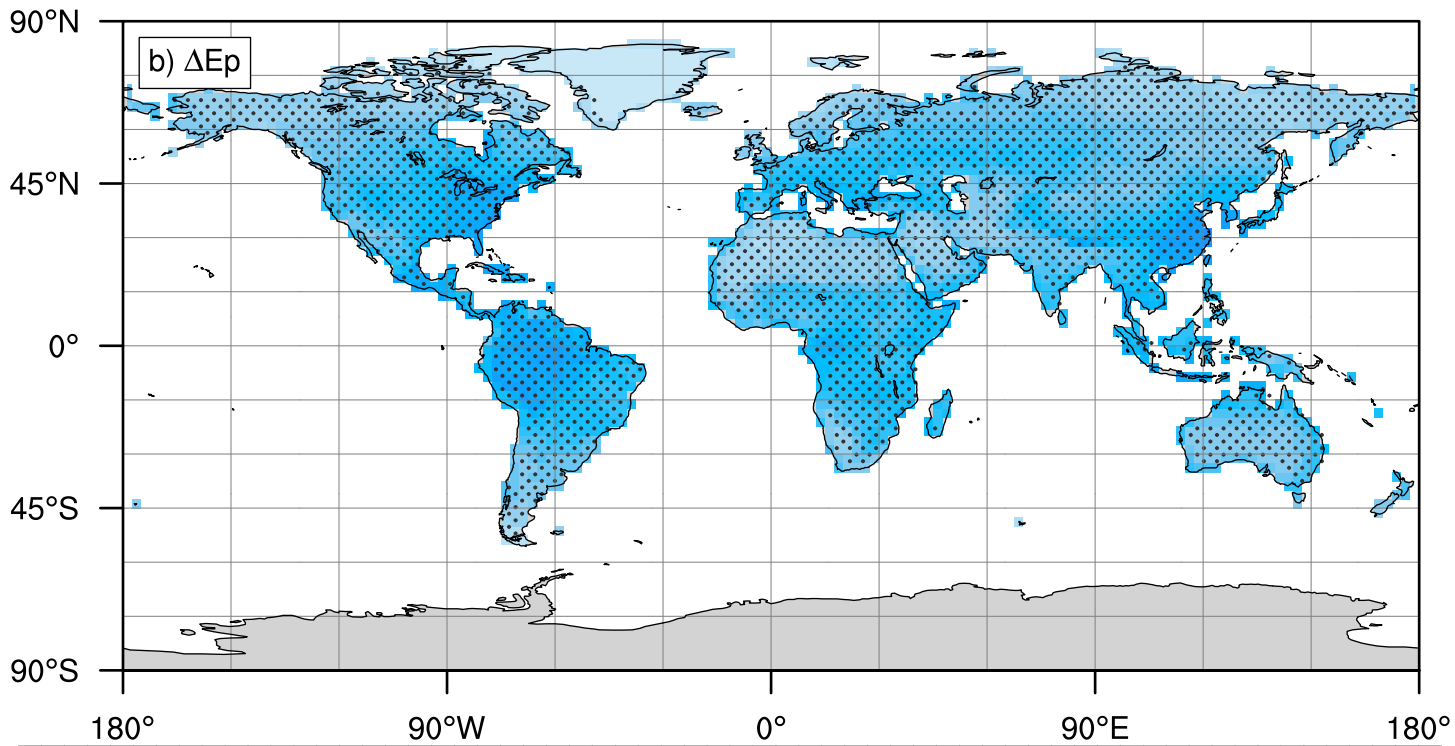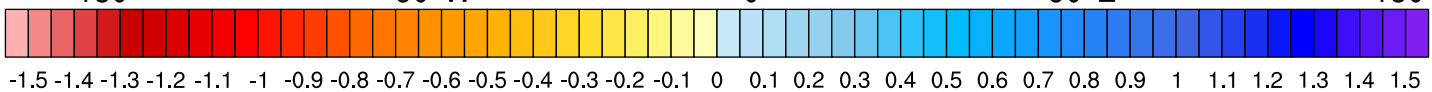

mm/day

Supplement: GRL-42-5493-s002.pdf [file GRL-42-5493-s002.pdf]

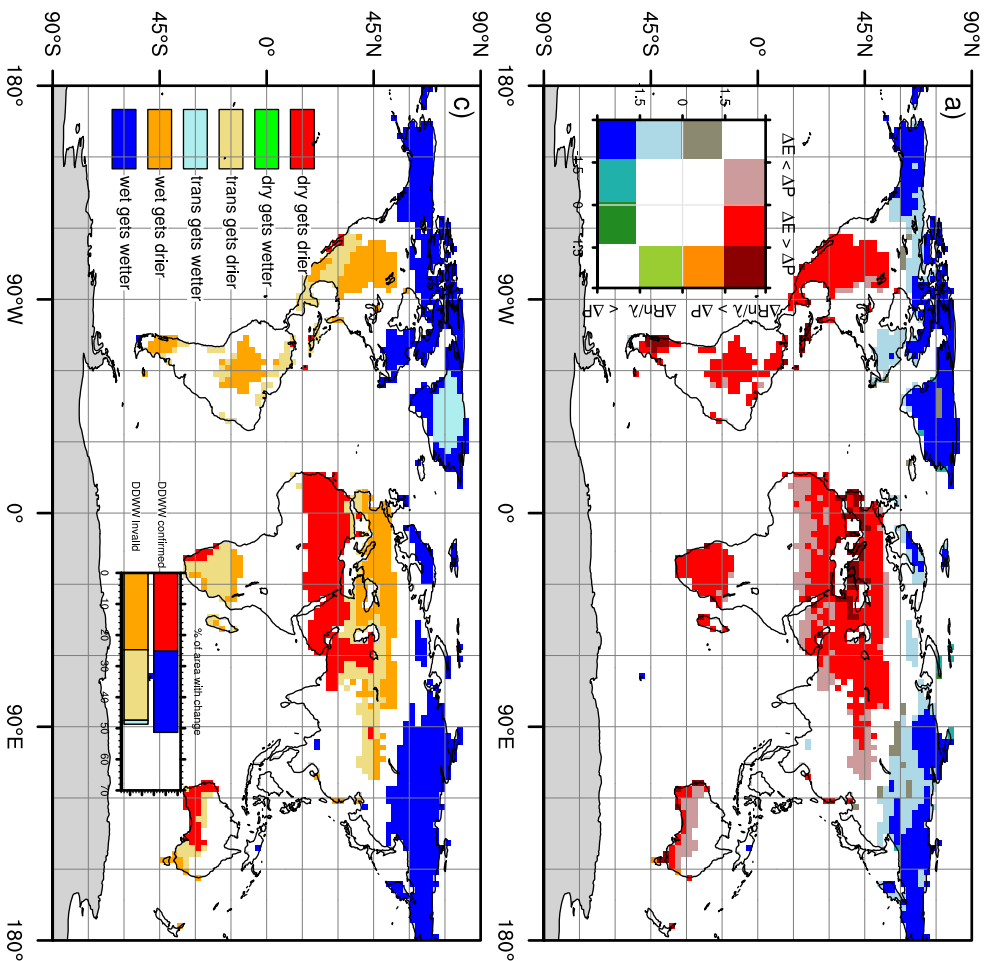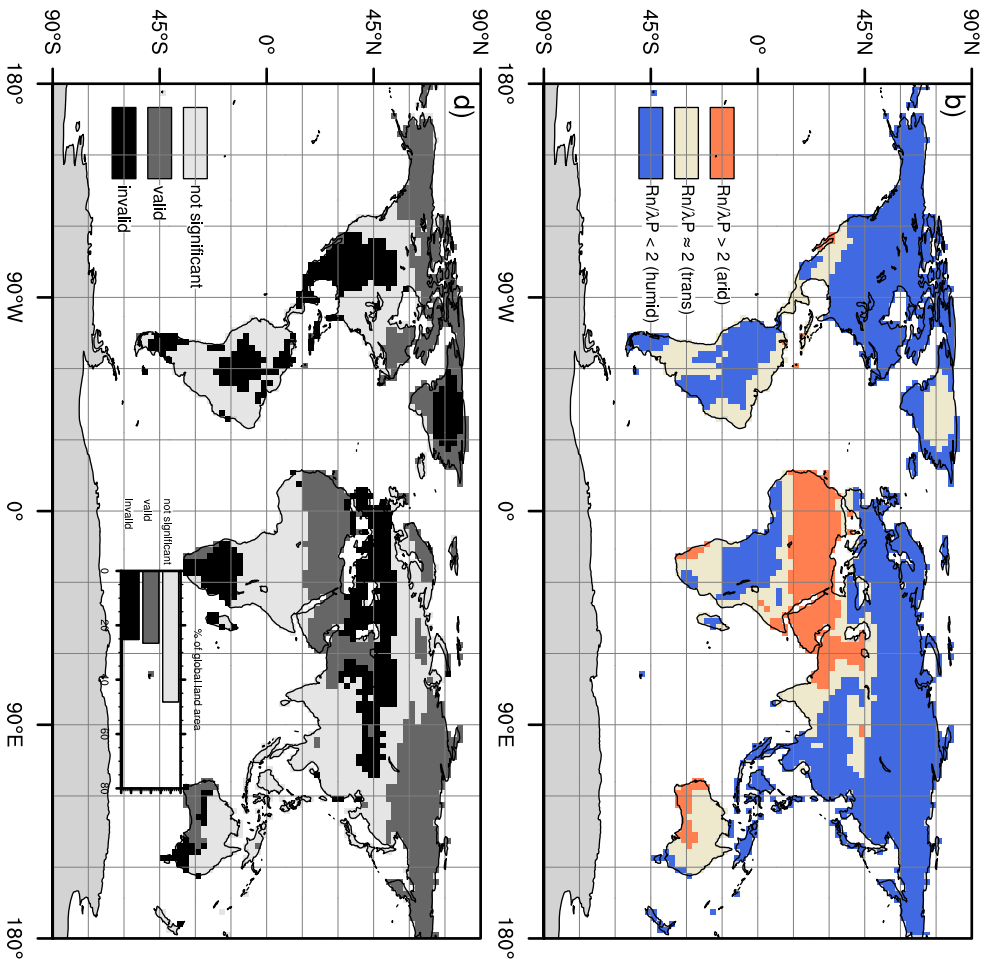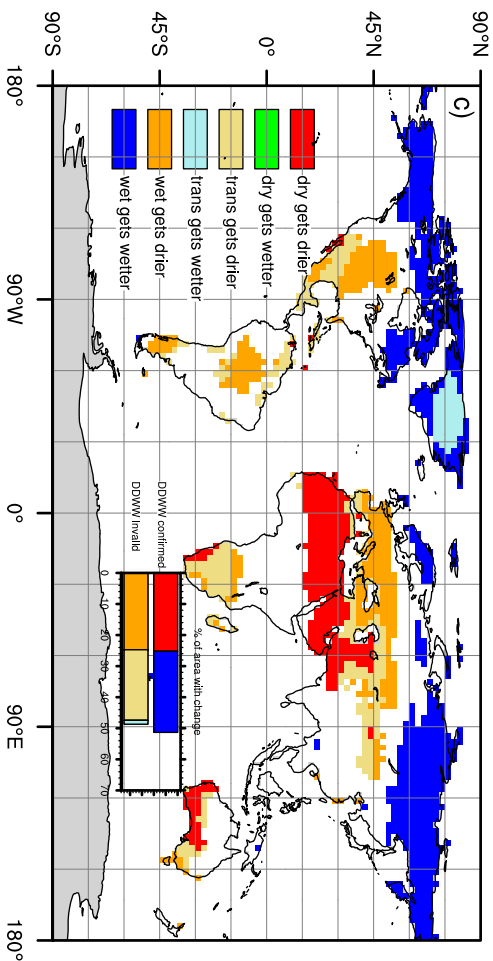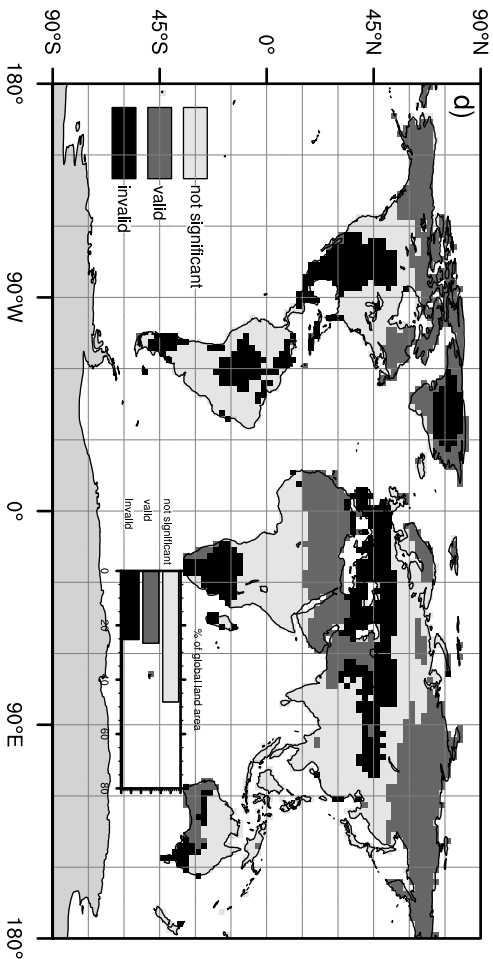

Supplement: GRL-42-5493-s003.pdf [file GRL-42-5493-s003.pdf]

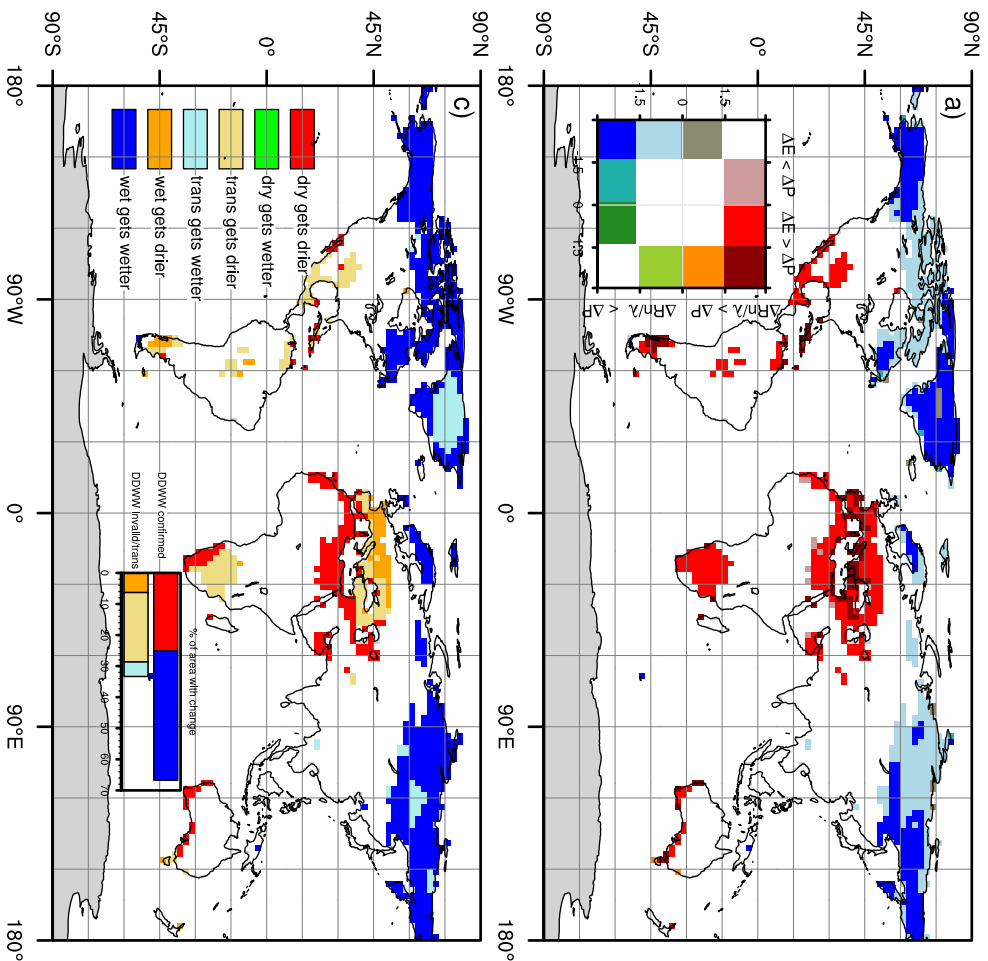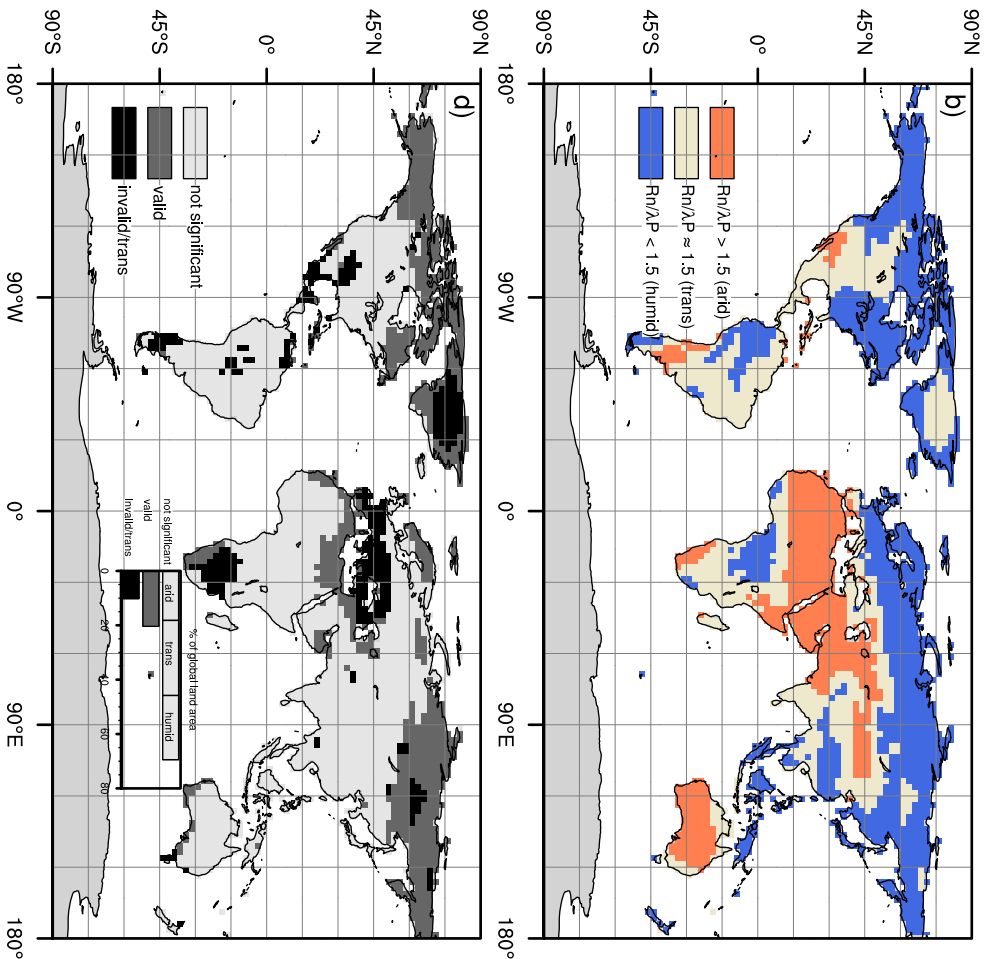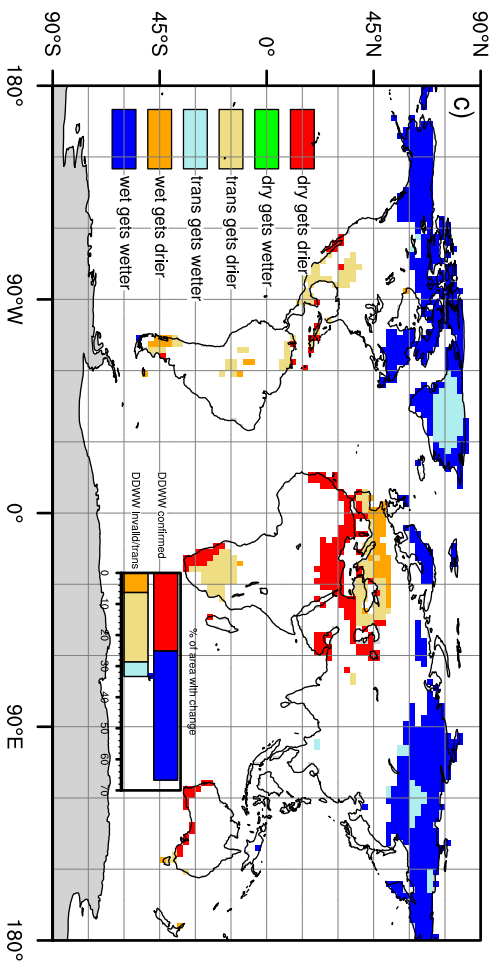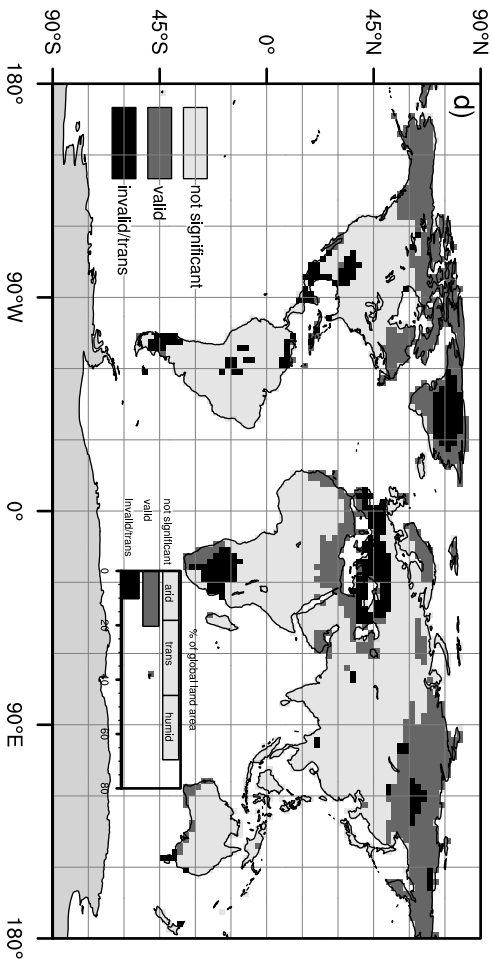

Supplement: GRL-42-5493-s004.pdf [file GRL-42-5493-s004.pdf]

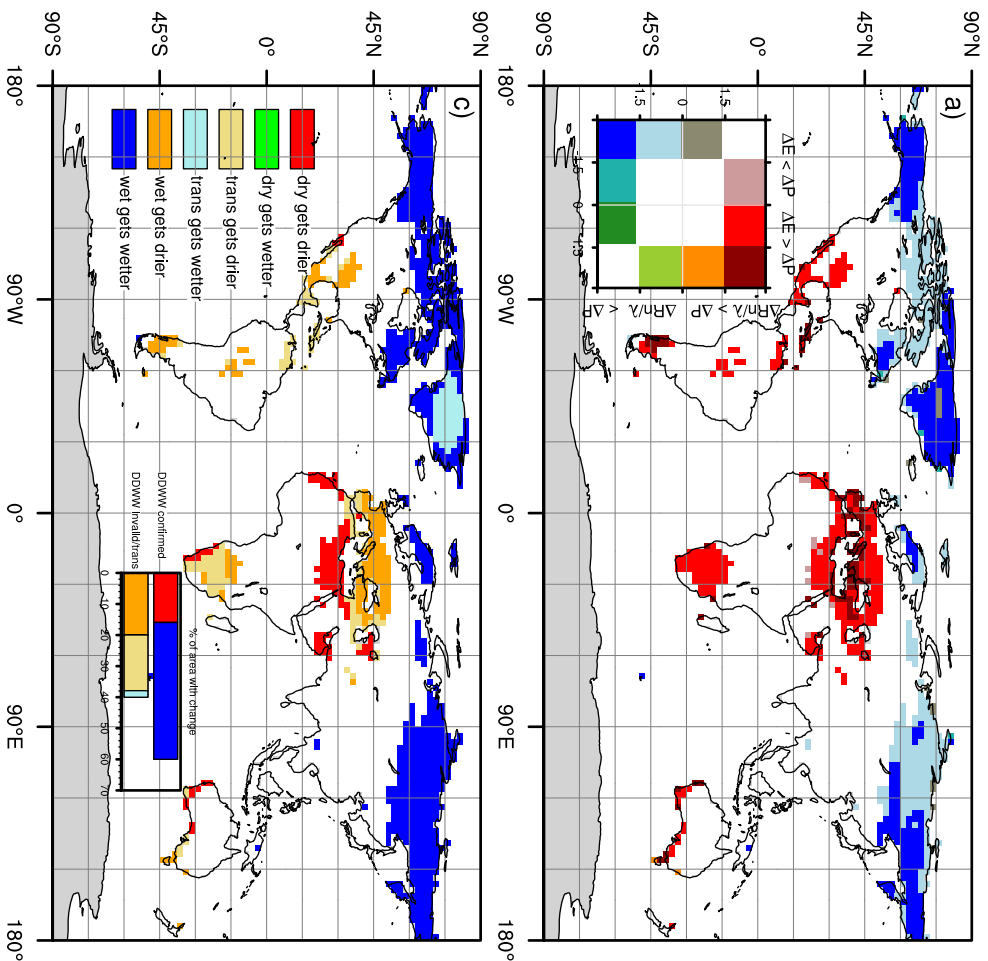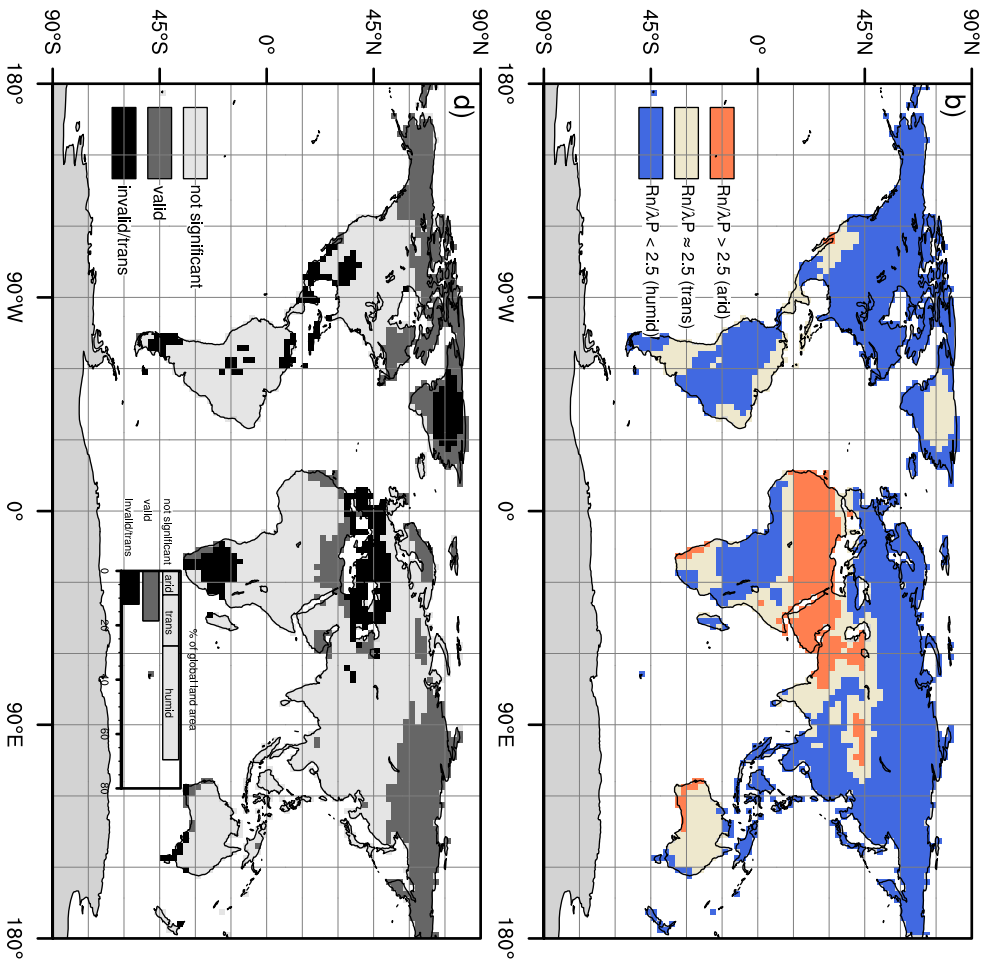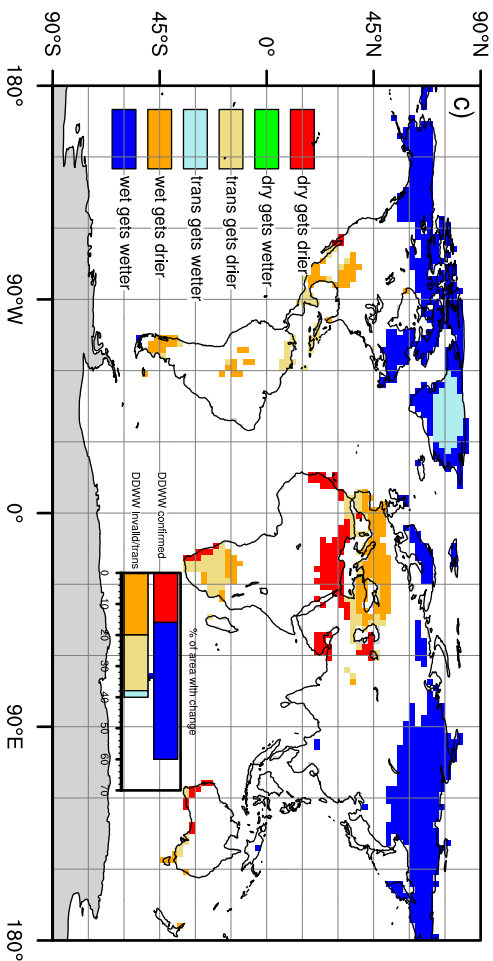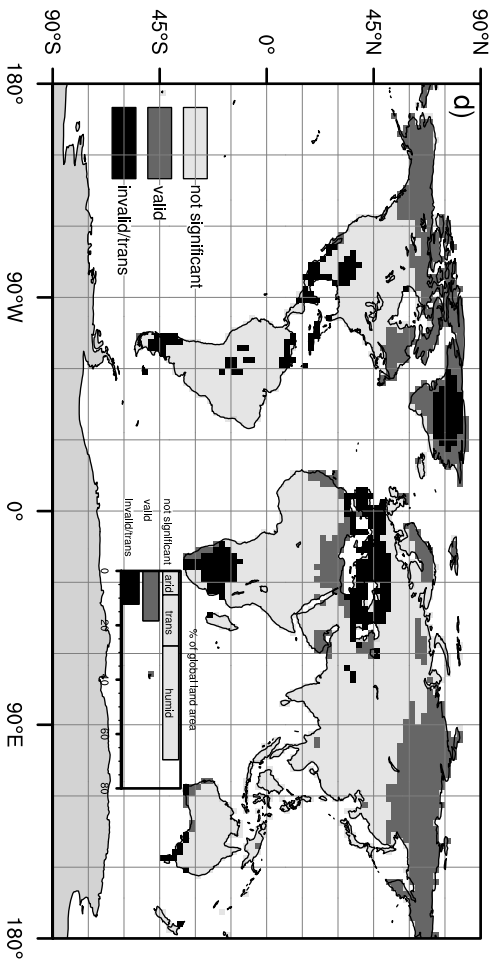

Supplement: GRL-42-5493-s005.pdf [file GRL-42-5493-s005.pdf]

MAM

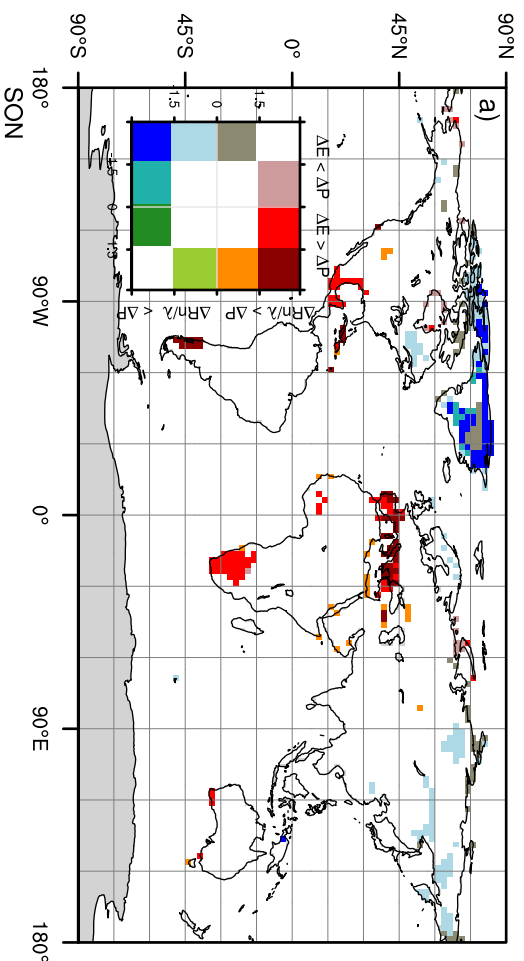

JJA

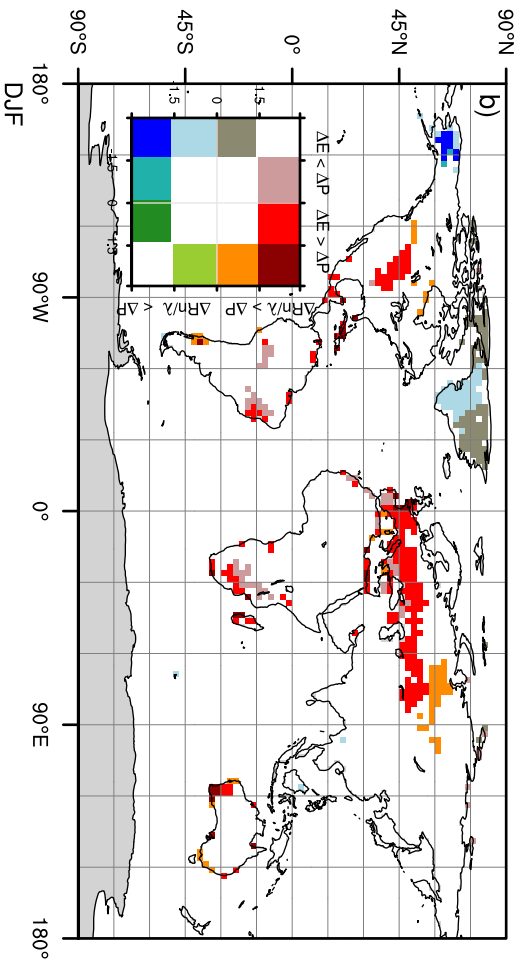

MAM

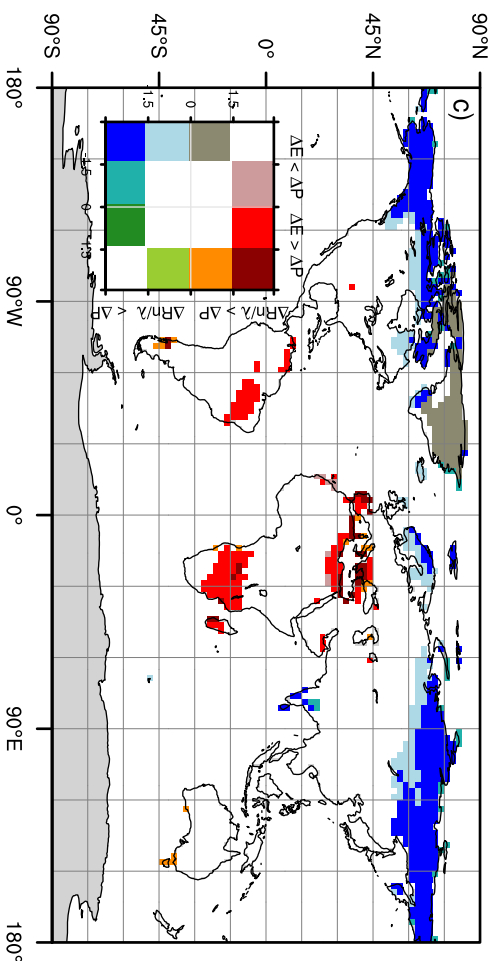

JJA

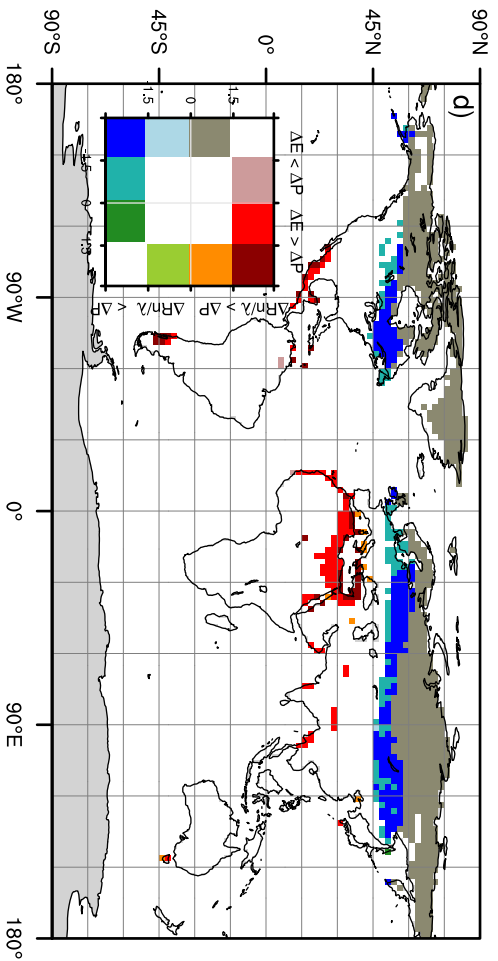

Supplement: GRL-42-5493-s006.pdf [file GRL-42-5493-s006.pdf]
